# Supplementary material for: Mortality Due to Chagas Disease in Brazil According to a Specific Cause
Source: PubMed Central journal article supplement (PMC4155553; doi:10.4269/ajtmh.13-0574), 2014-09-03
Supplement: SD4.pdf [file SD4.pdf]

SUPPLEMENTAL TABLE 1

Epidemiological aspects and mortality rate about the 237 deaths recorded as Chagas' disease acute form in the Mortality Information System, Brazil. 2000–2010

| Epidemiological aspects | <i>N</i> | %    | Mortality rate* |
|-------------------------|----------|------|-----------------|
| Gender                  |          |      |                 |
| Male                    | 131      | 55   | 0.01            |
| Age range               |          |      |                 |
| 0–4                     | 1        | 0.4  | 0.00            |
| 5–14                    | 1        | 0.4  | 0.00            |
| 15–29                   | 6        | 2.5  | 0.00            |
| 30–44                   | 26       | 11.0 | 0.01            |
| 45–59                   | 59       | 24.9 | 0.02            |
| 60–69                   | 53       | 22.4 | 0.05            |
| 70–79                   | 52       | 21.9 | 0.08            |
| 80 or +                 | 39       | 16.5 | 0.14            |
| Region of Brazil        |          |      |                 |
| North                   | 7        | 2.9  | 0.00            |
| Northeast               | 65       | 27.4 | 0.01            |
| Southeast               | 115      | 48.5 | 0.01            |
| South                   | 19       | 8.0  | 0.01            |
| Central-West            | 31       | 13.2 | 0.02            |

\*Calculated by mean of the mortality rate (×100,000 inhabitants) using the deaths recorded as numerator and the estimative and census (2000 and 2010) of the population as denominator for the period studied.

SUPPLEMENTAL TABLE 2

Standardized mortality rate (per 100,000 people) caused by cardiac and digestive involvement by region in Brazil

| Region       | 2000  |      | 2001 |      | 2002 |      | 2003 |      | 2004 |      | 2005 |      | 2006 |      | 2007 |      | 2008 |      | 2009 |      | 2010 |      |
|--------------|-------|------|------|------|------|------|------|------|------|------|------|------|------|------|------|------|------|------|------|------|------|------|
|              | CI*   | DI†  | CI   | DI   | CI   | DI   | CI   | DI   | CI   | DI   | CI   | DI   | CI   | DI   | CI   | DI   | CI   | DI   | CI   | DI   | CI   | DI   |
| North        | 0.40  | 0.02 | 0.46 | 0.03 | 0.48 | 0.04 | 0.46 | 0.08 | 0.42 | 0.02 | 0.37 | 0.03 | 0.34 | 0.07 | 0.42 | 0.06 | 0.45 | 0.10 | 0.35 | 0.02 | 0.40 | 0.07 |
| Northeast    | 1.75  | 0.11 | 1.63 | 0.12 | 1.65 | 0.10 | 1.51 | 0.15 | 1.53 | 0.10 | 1.52 | 0.12 | 1.79 | 0.19 | 1.68 | 0.19 | 1.68 | 0.22 | 1.50 | 0.19 | 1.60 | 0.21 |
| Southeast    | 3.72  | 0.34 | 3.51 | 0.30 | 3.22 | 0.33 | 3.22 | 0.34 | 3.17 | 0.35 | 3.13 | 0.31 | 2.71 | 0.39 | 2.47 | 0.39 | 2.58 | 0.42 | 2.29 | 0.39 | 2.15 | 0.37 |
| South        | 1.21  | 0.20 | 0.90 | 0.18 | 0.94 | 0.22 | 1.01 | 0.25 | 0.95 | 0.23 | 0.88 | 0.25 | 0.73 | 0.23 | 0.63 | 0.20 | 0.65 | 0.22 | 0.58 | 0.19 | 0.61 | 0.20 |
| Central-West | 10.61 | 0.69 | 9.65 | 0.70 | 9.20 | 0.98 | 8.75 | 0.86 | 8.02 | 0.88 | 6.83 | 0.75 | 6.46 | 1.02 | 5.69 | 1.13 | 5.93 | 0.99 | 5.34 | 1.00 | 5.28 | 1.16 |

\*Cardiac involvement.

†Digestive involvement.
